# Supplementary material for: Siglec-9 Restrains Antibody-Dependent Natural Killer Cell Cytotoxicity against SARS-CoV-2
Source: PubMed Central journal article supplement (PMC9973332; doi:10.1128/mbio.03393-22), 2023-02-02

## Supplementary Figure 2

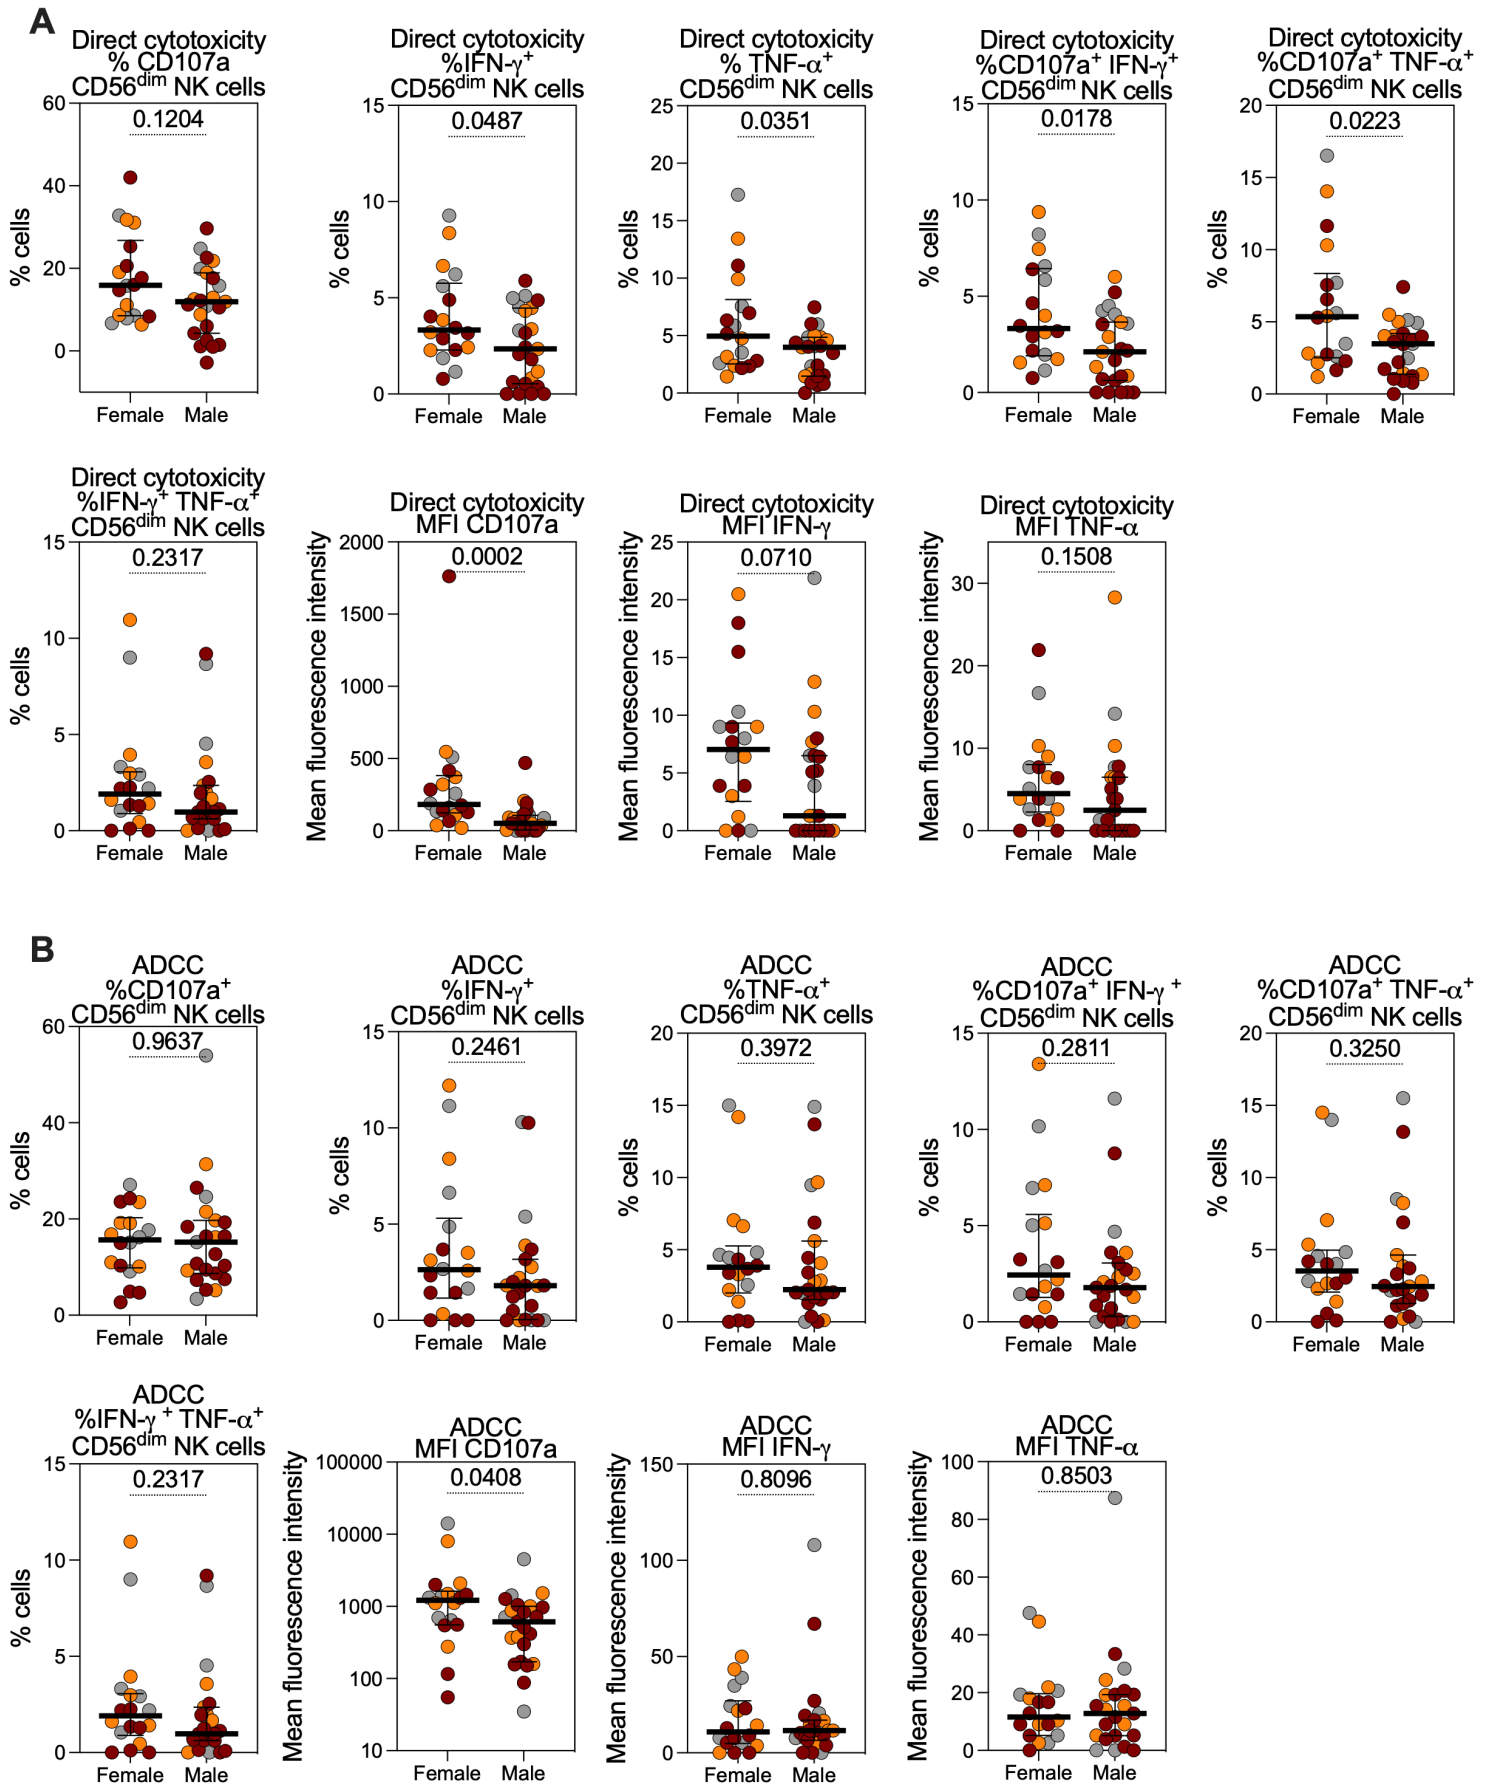

Supplement: mbio.03393-22-s0002.pdf [file mbio.03393-22-s0002.pdf]
