# Supplementary material for: Siglec-9 Restrains Antibody-Dependent Natural Killer Cell Cytotoxicity against SARS-CoV-2
Source: PubMed Central journal article supplement (PMC9973332; doi:10.1128/mbio.03393-22), 2023-02-02

## Supplementary Figure 4

● Siglec-7<sup>+</sup> CD56<sup>dim</sup> NK cells    ○ Siglec-7<sup>-</sup> CD56<sup>dim</sup> NK cells

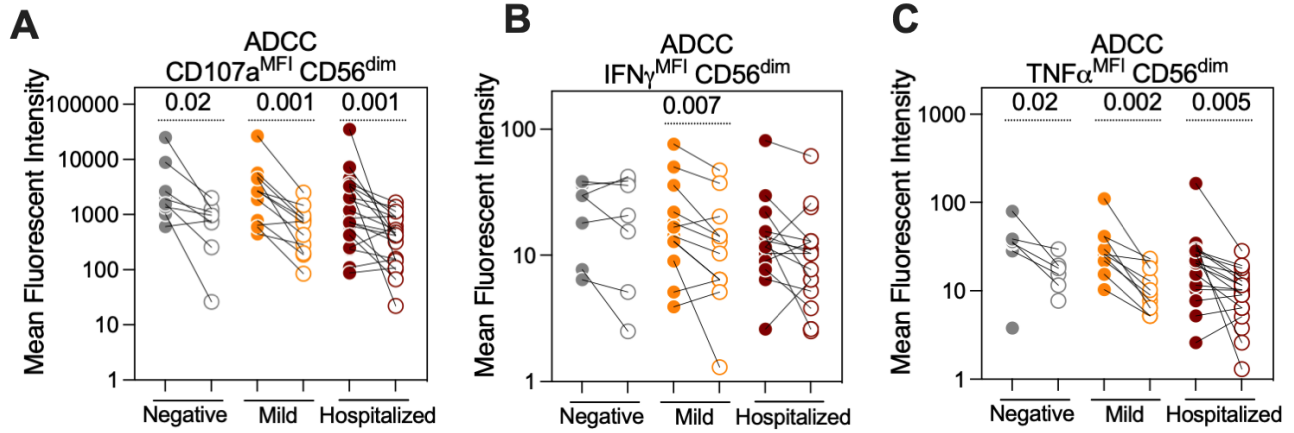

Supplement: mbio.03393-22-s0004.pdf [file mbio.03393-22-s0004.pdf]
